# Supplementary material for: Structural, optical, and electrochemical properties of tungsten-doped cadmium zinc phosphate nanoporous materials for energy storage and peroxide detection
Source: Royal Society of Chemistry journal article supplement (doi:10.1039/d5ra01248a), 2025-01-01
Supplement: d5ra01248a1.pdf [file d5ra01248a1.pdf]

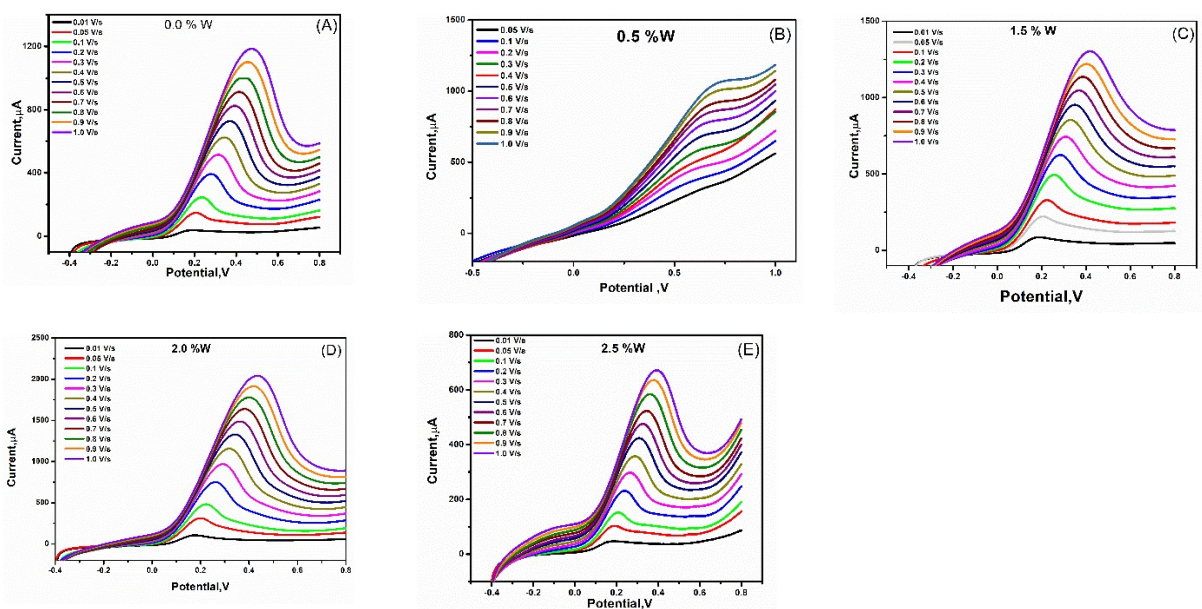

**Figure 1S :** (A-E) LSVs curves for synthesized CdO-ZnO-W-P<sub>2</sub>O<sub>5</sub> (CZWP) with different % of tungsten (A) 0.0 %W , (B) 0.5 %W, (C) 1.5 %W , (D) 2.0 %W and (E) 2.5 %W modified SPEs at different scan rates
